## Parkinsonian apathy responds to dopaminergic stimulation of D2/D3 receptors with piribedil

Stéphane Thobois,<sup>1,2</sup> Eugénie Lhommée,<sup>3</sup> Hélène Klinger,<sup>1</sup> Claire Ardouin,<sup>3</sup> Emmanuelle Schmitt,<sup>3</sup> Amélie Bichon,<sup>3</sup> Andrea Kistner,<sup>3</sup> Anna Castrioto,<sup>3</sup> Jing Xie,<sup>1</sup> Valerie Fraix,<sup>3</sup> Pierre Pelissier,<sup>3</sup> Stephan Chabardes,<sup>4</sup> Patrick Mertens,<sup>5</sup> Jean-Louis Quesada,<sup>6</sup> Jean-Luc Bosson,<sup>6</sup> Pierre Pollak,<sup>3</sup> Emmanuel Broussolle<sup>1,2</sup> and Paul Krack<sup>3</sup>

- 1 Hospices Civils de Lyon, Hôpital Neurologique, Neurologie C; Université Lyon I, Faculté de Médecine et de Maïeutique Lyon Sud Charles Mérieux, Lyon, France
- 2 CNRS, UMR 5229, Centre de Neurosciences Cognitives, Bron, France
- 3 Movement Disorder Unit, Department of Psychiatry and Neurology, CHU de Grenoble, Joseph Fourier University, 38043 Grenoble, France and INSERM, Unité 836, Grenoble Institut des Neurosciences, 38043 Grenoble, France
- 4 Neurosurgery Department, CHU de Grenoble, Joseph Fourier University, 38043 Grenoble, France and INSERM, Unité 836, Grenoble Institut des Neurosciences, 38043 Grenoble, France
- 5 Hospices Civils de Lyon, Hôpital Neurologique, Neurochirurgie A; Université Lyon I, Faculté de Médecine et de Maïeutique Lyon Sud Charles Mérieux, Lyon, France
- 6 Centre d'Investigation Clinique CHU de Grenoble, Laboratoire TIMC-IMAG, CNRS, UMR 5525, Joseph Fourier University, Grenoble F-38041, France

Correspondence to: Dr Stéphane Thobois, MD, PhD  
Hôpital Neurologique Pierre Wertheimer,  
Neurologie C 59 Bd Pinel,  
69677 Bron, France  
E-mail: stephane.thobois@chu-lyon.fr

Apathy is one of the most common symptoms encountered in Parkinson's disease, and is defined as a lack of motivation accompanied by reduced goal-directed cognition, behaviour and emotional involvement. In a previous study we have described a delayed withdrawal syndrome after successful motor improvement related to subthalamic stimulation allowing for a major decrease in dopaminergic treatment. This withdrawal syndrome correlated with a diffuse mesolimbic dopaminergic denervation. To confirm our hypothesis of parkinsonian apathy being related to mesolimbic dopaminergic denervation, we performed a randomized controlled study using piribedil, a relatively selective D2/D3 dopamine agonist to treat parkinsonian apathy, using the model of postoperative apathy. A 12-week prospective, placebo-controlled, randomized, double-blinded trial was conducted in 37 patients with Parkinson's disease presenting with apathy (Starkstein Apathy Scale score > 14) following subthalamic nucleus stimulation. Patients received either piribedil up to 300 mg per day ( $n = 19$ ) or placebo ( $n = 18$ ) for 12 weeks. The primary end point was the improvement of apathy under treatment, as assessed by the reduction of the Starkstein Apathy Scale score in both treatment groups. Secondary end points included alleviation in depression (Beck Depression Inventory), anxiety (Beck Anxiety Inventory), improvement of quality of life (PDQ39) and anhedonia (Snaith-Hamilton Pleasure Scale). Exploratory endpoints consisted in changes of the Robert Inventory score and Hamilton depression scales. An intention to treat analysis of covariance analysis was performed to compare treatment effects ( $P < 0.05$ ). The number of premature study dropouts was seven in the placebo and five in the piribedil groups, mostly related to intolerance to hypodopaminergic symptoms. At follow-up evaluation, the apathy score was reduced by 34.6% on piribedil versus 3.2% on placebo ( $P = 0.015$ ). With piribedil, modifications in the Beck depression and anxiety scores were  $-19.8\%$  and

–22.8%, respectively versus +1.4% and –8.3% with placebo, without reaching significance level. Piribedil led to a trend towards improvement in quality of life (–16.2% versus +6.7% on placebo;  $P = 0.08$ ) and anhedonia (–49% versus –5.6% on the placebo;  $P = 0.08$ ). Apathy, assessed by the Robert Inventory score, improved by 46.6% on piribedil and worsened by 2.3% on placebo ( $P = 0.005$ ). Depression, measured by the Hamilton score, improved in the piribedil group ( $P = 0.05$ ). No significant side effects were observed. The present study provides a class II evidence of the efficacy of the dopamine agonist piribedil in the treatment of apathy in Parkinson's disease.

**Keywords:** Parkinson; apathy; piribedil; dopamine agonist; subthalamic nucleus

## Introduction

Non-motor neuropsychiatric manifestations in Parkinson's disease encompass various manifestations (Aarsland *et al.*, 2009; Chaudhuri and Schapira, 2009). Apathy is one of the most common symptoms encountered in patients with Parkinson's disease and is defined as a lack of motivation accompanied by reduced goal-directed cognition, behaviour and emotional involvement (Levy and Dubois, 2006; Dujardin and Defebvre, 2012; Starkstein, 2012). Its prevalence in Parkinson's disease varies from 16 to 42% across studies because of different methods of assessment (Pluck and Brown, 2002). Apathy may be observed at all stages of the disease, in isolation or more frequently in association with dementia, depression or anxiety (Aarsland *et al.*, 2009; Barone *et al.*, 2010). Apathy can also appear after subthalamic nucleus deep brain stimulation, often associated with depression and anxiety (Krack *et al.*, 2003; Funkiewiez *et al.*, 2004; Czernecki *et al.*, 2008; Witt *et al.*, 2008). Convergent data suggest that apathy, depression and anxiety observed after subthalamic nucleus deep brain stimulation are part of a hypodopaminergic syndrome related to mesolimbic dopaminergic lesions (Remy *et al.*, 2005; Czernecki *et al.*, 2008; Thobois *et al.*, 2010). Given the predominance of dopamine D3 receptors in the mesolimbic dopaminergic system, there is a clear rationale in targeting these receptors using dopamine agonist to improve hypodopaminergic manifestations (Sokoloff *et al.*, 2006). This hypothesis is further supported by non-controlled studies showing an improvement in parkinsonian apathy following the reintroduction of dopaminergic agonists such as ropinirole (Czernecki *et al.*, 2008; Rektorova *et al.*, 2008). Other authors have also shown that pramipexole alleviates depression in Parkinson's disease or patients without Parkinson's disease (Leentjens *et al.*, 2009; Barone *et al.*, 2010). One of the first demonstrations of the efficacy of this strategy to treat depression was provided by Post *et al.* (1978) using piribedil, another D2/D3 dopamine agonist (Millan, 2010). However, no controlled study permitting definite confirmation of this strategy of treatment of apathy and depression in Parkinson's disease exists to date. This is a crucial issue owing to the frequency of these manifestations and their consequences in terms of increased incidence of suicide attempts in operated patients and their impact on quality of life (Schrager *et al.*, 2000; Voon *et al.*, 2008; Chaudhuri and Schapira, 2009).

The present placebo controlled study aims to demonstrate the efficacy of piribedil, a non-ergot D2/D3 dopamine agonist, in the treatment of postoperative parkinsonian apathy.

## Materials and methods

The trial was designed as a prospective, randomized, double blind, placebo-controlled study, with 50/50 allocation ratio.

### Patients

#### Inclusion criteria

One hundred and two consecutive patients with Parkinson's disease operated on for bilateral subthalamic nucleus deep brain stimulation in two centres (Grenoble and Lyon) were enrolled. Patients <70 years without surgical contraindications underwent bilateral subthalamic nucleus stimulation because of severe L-DOPA related motor complications (Limousin *et al.*, 1998; Deuschl *et al.*, 2006; Odekerken *et al.*, 2013). Surgical implantation of the leads bilaterally in the subthalamic nucleus and of the neurostimulator (leads 3389 and Kinetra, Medtronic) was performed as previously described (Krack *et al.*, 2003). A detailed neuropsychological assessment was performed before surgery (Thobois *et al.*, 2010). After surgery, dopamine agonists were suppressed and levodopa was reduced as much as allowed by the motor state. Then, monthly assessments of apathy and depression on stimulation and under chronic medication with very low doses of levodopa were carried out by telephone, using the Starkstein Apathy Scale and the Beck Depression Inventory to detect patients who became apathetic and/or depressed after surgery.

The present study concerned all patients, who became apathetic during the first year following deep brain stimulation whatever the delay between surgery and the occurrence of apathy. Apathy was defined as a Starkstein Apathy Scale score >14 or if the Starkstein Apathy Scale score increased by five points with clinically significant apathy as judged by both the patient and neurologist between the preoperative and postoperative monthly telephone evaluations. Apathy occurred after a mean of 4.7 months (3.3–8.2) after surgery and represented the main inclusion criteria being the most prevalent symptom of postoperative withdrawal syndrome of dopamine replacement therapy.

Apathetic patients were then randomized as soon as possible (typically within a few days) in the piribedil versus placebo double blind pharmacological study evaluating the effects of piribedil, a D2/D3 agonist, on parkinsonian apathy. The trial protocol was registered on [www.clinicaltrials.gov](http://www.clinicaltrials.gov) (N° NCT01020682). The ethics committee of Grenoble University approved the study, and all patients gave written informed consent.

#### Exclusion criteria

Surgical contraindications, dementia or any major ongoing psychiatric illness constituted general exclusion criteria (Krack *et al.*, 2003). Patients presenting, in the preoperative ON-drug evaluation condition, apathy as defined by a Starkstein Apathy Scale (Starkstein *et al.*, 1992)

score  $\geq 14$  or the presence of moderate to severe depression (score  $\geq 20$ ) on Beck Depression Inventory (Beck *et al.*, 1961) were excluded.

Intervention

Before starting the pharmacological study, neuropsychological and motor assessments were performed. These included evaluations of depression [Beck Depression Inventory (Beck *et al.*, 1961) and Hamilton scale (Hamilton, 1960)], apathy [Starkstein Apathy Scale (Starkstein *et al.*, 1992) and Robert Inventory (Robert *et al.*, 2002)], anxiety (Beck Anxiety Inventory (Beck *et al.*, 1988), anhedonia [Snaith-Hamilton Pleasure Scale, (Snaith *et al.*, 1995)], mania (Young *et al.*, 1978), hyperdopaminergic behaviour (Ardouin *et al.*, 2009) (mean for the following hyperdopaminergic items in the Ardouin Scale: punning, risk-taking behaviours, creativity, compulsive buying, pathological gambling, addiction to levodopa, hypersexuality, binge eating, nocturnal hyperactivity and hobbyism). In addition, motor status was assessed using the Unified Parkinson's Disease Rating Scale part III in on stimulation/OFF medication condition in order to assess the motor benefit of subthalamic stimulation and indirectly a correct lead placement. Daily life activities were assessed with Unified Parkinson's Disease Rating Scale II, and motor complications with Unified Parkinson's Disease Rating Scale IV subscores. Quality of life was assessed using the PDQ39 scale. Robert apathy inventory, Hamilton and Ardouin scales were administered in the chronic treatment condition. Starkstein Apathy Scale, Snaith-Hamilton Pleasure Scale, Beck Depression Inventory, Beck Anxiety Inventory and Young

scales were administered in the on stimulation/chronic treatment condition.

Patients received domperidone (60mg/day) and were randomly assigned to either the placebo or the piribedil group. Both the patients and investigators were blinded after assignment to interventions.

Throughout the protocol, when severe depression appeared as defined per protocol by a Beck Depression Inventory depression score  $> 28$ , patients were excluded from the pharmacological study and received open treatment with an antidepressant drug and/or a dopamine agonist according to individual decision of the treating investigator. Piribedil/placebo dosages were increased in 50mg steps per week in the first 2 weeks, then every 2 weeks to a maximum of 200mg/day. After 6 weeks, the patient had a neurological evaluation and assessments of apathy and mood (Starkstein Apathy Scale and Beck Depression Inventory) in the on stimulation/chronic treatment condition. If apathy score remained  $> 14$ , the piribedil/placebo daily dose was increased in 50mg steps every 2 weeks to a maximum of 300mg/day.

After 12 weeks of pharmacotherapy, baseline neuropsychological and motor assessments were repeated. Thus three visits were performed for evaluations (baseline, 6 weeks and 12 weeks). After completion of the pharmacological protocol, piribedil was prescribed in an open-label fashion to all the patients. As neurologists were blinded, they disposed of the possibility to prescribe run-out study medication over 2 weeks before replacing the study medication with open treatment with piribedil to avoid side effects of a too rapid increase in medication. The duration of this run out period could be reduced based on patient's tolerance to piribedil. The design of the study is presented in Fig. 1.

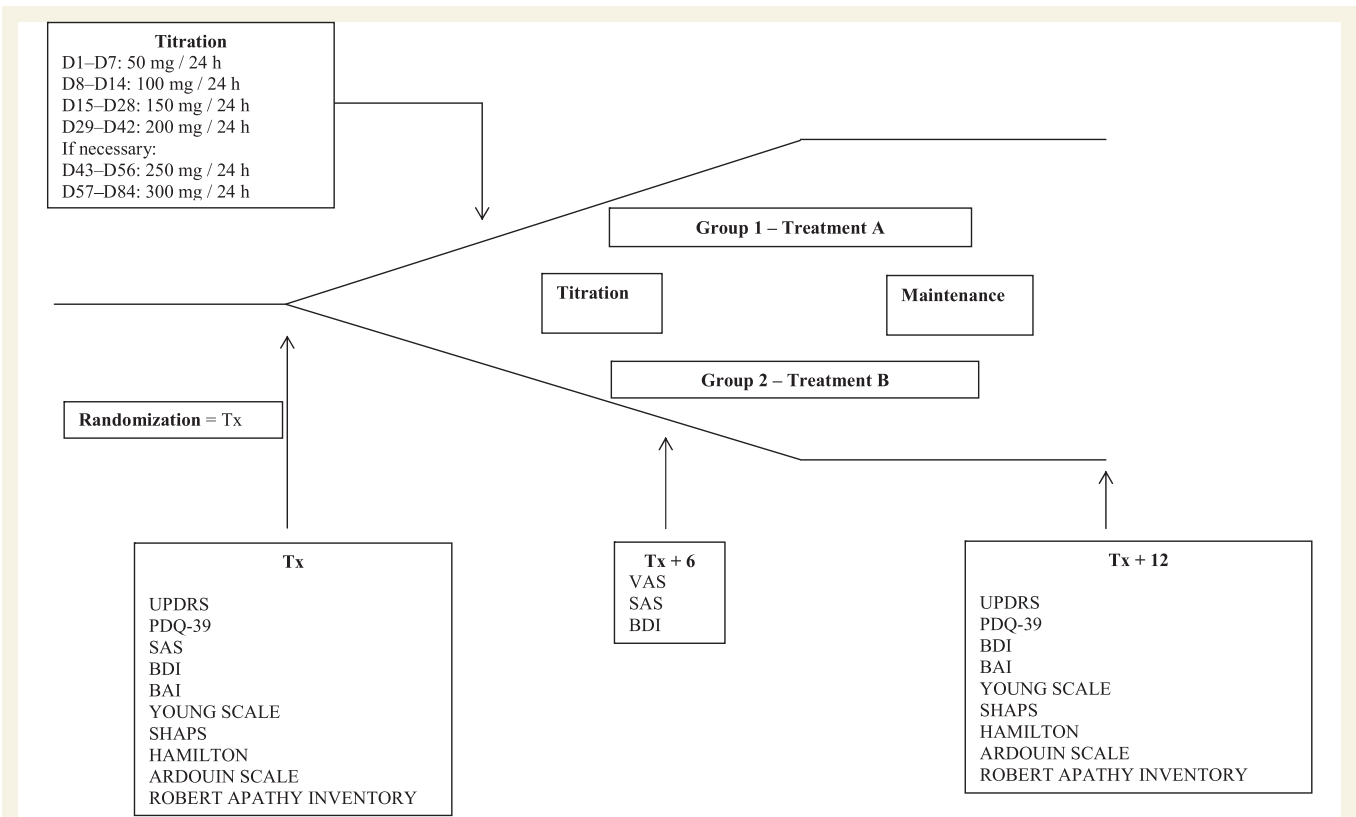

**Figure 1** Design of the study. BAI = Beck Anxiety Inventory; BDI = Beck Depression Inventory; D = Day; SAS = Starkstein Apathy Score; UPDRS = Unified Parkinson's Disease Rating Scale; VAS = Visual Analogue Scale.

## Sample size

The sample size was calculated taking into account an expected difference of efficacy of 30% (5.1 points on the Starkstein Apathy Scale) between the two groups in the primary endpoint (change of Starkstein Apathy Scale Score between baseline and 12 weeks) later corresponding to a large effect size of 1.02, using a two-tailed test with an alpha risk of 5% and a power of 80%. Seventeen patients per group were necessary based on an estimated variance of 25.

## Randomization

The randomization list was generated by the company Euthérapie with an in-house validated application software. Randomization was stratified and balanced by centre. The hospital pharmacies were delivered blinded encapsulated treatments (placebo or piribedil) by Euthérapie. Blinded treatments could be identified only by a randomization

number, the significance of which was known only to Euthérapie until the end of the study and statistical analysis.

## Outcomes

Primary outcome consisted in the Starkstein Scale score (Starkstein Apathy Scale) assessed in the on stimulation/chronic treatment condition and tested using ANCOVA analysis adjusted by baseline Starkstein Apathy Scale values to allow comparison of treatment effects between Weeks 1 and 12 ( $P < 0.05$ ).

Secondary (Beck Depression Inventory, Beck Anxiety Inventory, Snaith-Hamilton Pleasure Scale, PDQ39 Summary Index) and exploratory (Hamilton score, Robert's Inventory Apathy Scale, Unified Parkinson's Disease Rating Scale I to VI, Young mania scale) outcomes were analysed using ANCOVA analysis adjusted by baseline values to allow comparison of treatment effects between Weeks 1 and 12 or Mann-Whitney test for non-Gaussian assumption ( $P < 0.05$ ).

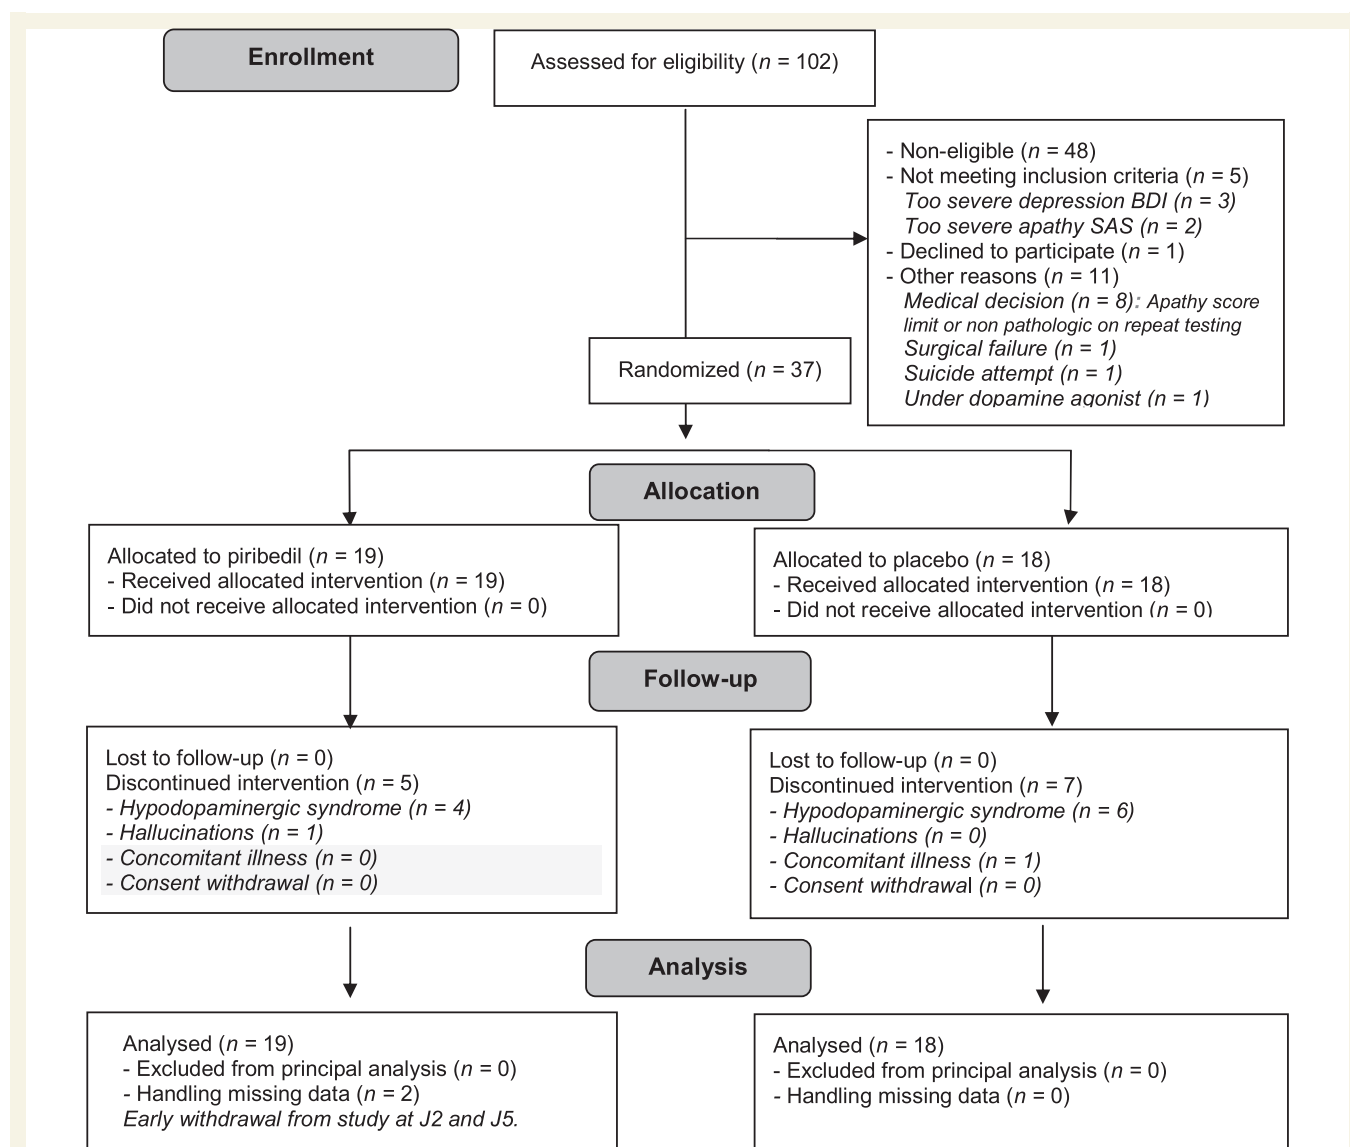

**Figure 2** Flow chart of the study.

BDI = Beck Depression Inventory; SAS = Starkstein Apathy Score.

# Statistical analysis

The analysis was conducted using the intent to treat population, with last observation carried forward imputation for any missing values at Week 12. This analysis was performed blind to the treatment received.

Data were summarized in terms of size and frequency for categorical parameters, and by means and standard deviations for continuous parameters, or by median and 25th, 75th percentiles where necessary.

Baseline characteristics were compared using Student's *t*-test for continuous parameters. A Mann-Whitney test was applied for non-Gaussian assumption. Independence between qualitative parameters was assessed using either the chi-square test or Fisher's exact test. Statistical analyses were performed using STATA release 12 (StataCorp) PC-Software.

# Results

## Patients

The trial flow chart is presented in Fig. 2. Recruitment was performed between January 2005 and October 2010. Of the operated patients, 65 of 102 were not enrolled in the pharmacological study. Most were ineligible because they did not develop apathy (*n* = 48). Seventeen did not participate despite a Starkstein Apathy Scale score >14. Six of these were not included because of excessively severe and subjectively intolerable apathy, typically accompanied with anxiety and irritability (*n* = 2) or depression (*n* = 3) or an impulsive suicide attempt (*n* = 1). Owing to the severity of this hypodopaminergic syndrome, patients required open-label prescription of dopamine agonists and/or an anti-depressant drug. Other reasons for non-participation in the study were: surgical failure preventing drug decrease (*n* = 1); reduced activity due to hip pain, affecting the apathy score in the absence of clear-cut clinical apathy (*n* = 1); spontaneous fluctuation of the apathy score around the cut-off on repeat testing without clinically relevant apathy (*n* = 8); non-compliance with self-prescription of a dopamine agonist (*n* = 1).

Thirty-seven patients were included in the pharmacological trial. The delay between the occurrence of apathy and the inclusion in the trial was typically within a few days, the maximum duration being 2 weeks. Thirty-six patients presented a Starkstein Apathy Scale score >14 and one a clinically relevant 5-point increase of Starkstein Apathy Scale score between the preoperative and post-operative evaluations. Among these 37 patients, 28 were not depressed. Eighteen were assigned to receive placebo and 19 piribedil. The two groups did not differ in terms of age, equivalence of levodopa dose, motor symptoms and motor complication severity, stimulation parameters, apathy, depression and anxiety scores at baseline. All the patients were treated either by levodopa monotherapy or a combination of levodopa and entacapone with a minimal per protocol dose of 3 × 25 mg of levodopa. In case a patient required an increase in anti-parkinsonian medication because of an increase in motor symptoms that could not be compensated by an increase in stimulation parameters, only an increase in L-DOPA or L-DOPA/entacapone were allowed. No patient was prescribed amantadine or a monoamine oxidase B inhibitor or any other dopamine agonist apart from study medication. The levodopa equivalent doses at baseline and the end of the study are indicated in Table 1. Patients' baseline clinical characteristics are presented in Table 1.

Seven patients in the placebo group failed to complete the full study. The reasons for premature withdrawal were: intolerance of the hypodopaminergic syndrome (*n* = 6) within the first 6 weeks of the study; prostate adenocarcinoma surgery (*n* = 1). Four subjects in the piribedil group withdrew from the study within the first 6 weeks of the study because of intolerance of the hypodopaminergic syndrome, and one was excluded because of hallucination. Intent to treat analysis was performed in 19 patients on piribedil (14 evaluated at 12 weeks and five evaluated at the moment they discontinued the protocol) and 18 patients on placebo (11 evaluated at 12 weeks and seven evaluated at the moment they discontinued the protocol). The mean dose received of piribedil at the end of the study was 239.2 ± 154.8 mg/24 h.

**Table 1** Clinical characteristics of the patients at baseline

|                                                                                                         | Piribedil group<br>( <i>n</i> = 19) | Placebo group<br>( <i>n</i> = 18) |
|---------------------------------------------------------------------------------------------------------|-------------------------------------|-----------------------------------|
| Age (years)                                                                                             | 58.6 ± 6.5                          | 55.6 ± 8                          |
| Sex                                                                                                     | 10 M/9 F                            | 11 M/7 F                          |
| Disease duration (years)                                                                                | 12 ± 3.5                            | 11.1 ± 2.6                        |
| Starkstein Apathy Scale                                                                                 | 21.1 ± 4.8                          | 18.9 ± 4.2                        |
| Beck depression inventory                                                                               | 16.7 ± 5.9                          | 14.3 ± 6.6                        |
| Beck anxiety inventory                                                                                  | 14.9 ± 10.5                         | 8.4 ± 6.2                         |
| UPDRS motor score (/108) (OFF medication/on stimulation)                                                | 19.3 ± 9.8                          | 14.9 ± 5.1                        |
| UPDRS motor complications score                                                                         | 1.5 ± 2.1                           | 1.1 ± 1.6                         |
| L-DOPA dose (mg/day; range)                                                                             | 200 [75; 300]                       | 150 [75; 250]                     |
| Percentage of anti-parkinsonian treatment reduction after surgery (levodopa equivalent; mg /day; range) | 87% [65; 90]                        | 89% [80; 95]                      |
| Stimulation parameters [V/pulse width (μs)/Hz]                                                          | 2.77/60/130                         | 2.78/60/130                       |

UPDRS = Unified Parkinson's Disease Rating Scale.



## Neuropsychological status

### Primary endpoint: evolution of the apathy score

Apathy clearly improved on piribedil. The Starkstein Apathy Scale score was reduced by 34.6% on piribedil compared with 3.2% on placebo ( $P = 0.015$ ) (Fig. 3). Furthermore, the number of patients in whom apathy disappeared (i.e. Starkstein Apathy Scale strictly inferior to 14) was significantly greater under piribedil (47.4 versus 16.7%). The therapeutic response was usually achieved within the first 6 weeks of treatment. After piribedil re-introduction or introduction in all the patients in an open fashion, the improvement of apathy was preserved in the patients who received piribedil in the double blind study, while patients treated with placebo typically experienced an improvement of their apathy, once they had open treatment with piribedil. These data are not presented as they were not analysed, all the statistics being done before unblinding the randomization.

### Secondary endpoints

Evolution of anxiety (Beck Anxiety Inventory) and depression (Beck Depression Inventory) scores was not statistically different in the two groups despite a greater reduction in anxiety and depression scores in the piribedil group. There was a trend ( $P = 0.08$ ) for greater improvement of quality of life and anhedonia (Snaith-Hamilton Pleasure Scale scale) on piribedil.

### Exploratory endpoints

Apathy, assessed by the Robert Inventory score, fell by 46.6% on piribedil and increased by 2.3% on the placebo ( $P = 0.005$ ). Depression, measured by the Hamilton score, improved in the piribedil group ( $-34\%$  versus  $-2\%$ ;  $P = 0.05$ ). No significant changes on the Young mania scale or in hyperdopaminergic behaviours (Ardouin scale) were noted in either the piribedil or the placebo group. No significant differences of changes in Unified Parkinson's Disease Rating Scale motor and motor complication scores were observed. Unified Parkinson's Disease Rating

Scale daily life activity was improved in the piribedil group. Results are summarized in Table 2.

## Side effects

Frequency of side effects observed during the protocol did not differ between groups and are summarized in Table 3.

## Classification of evidence

Because of a high dropout rate, this interventional study provides class II level of evidence that piribedil, a D2/D3 dopamine agonist, significantly alleviates postoperative apathy in patients with Parkinson's disease implanted with bilateral subthalamic nucleus deep brain stimulation, as measured with the Starkstein apathy scale (34.6% on piribedil compared with 3.2% on placebo;  $P = 0.015$ ) (Sackett *et al.*, 1991).

## Discussion

The present randomized controlled study demonstrates for the first time, that piribedil, a D2/D3 dopamine agonist, significantly alleviates postoperative apathy in patients with Parkinson's disease implanted with bilateral subthalamic nucleus deep brain stimulation, as measured with either the Starkstein Apathy Scale ( $-34.6\%$ ) or the Robert Apathy Inventory ( $-46.6\%$ ). This efficacy was also proven by a significantly greater number of patients, in whom apathy disappeared (i.e. Starkstein Apathy Scale strictly  $< 14$ ) under piribedil (47.4 versus 16.7%). Alleviation of depression was shown with the Hamilton scale and the Beck depression scale but the difference between groups was significant only on the Hamilton scale. A trend for improvement in anhedonia accompanied improvement in apathy and mood. Although there was no difference in motor scores and motor complications, daily life activities improved slightly, and there was a trend towards improvement in quality of life on piribedil.

Our study is in line with a previous non-controlled study showing the benefits of ropinirole, another D2/D3 dopamine agonist, in the treatment of postoperative apathy in patients with Parkinson's disease (Czernecki *et al.*, 2008). The present controlled study reinforces this treatment strategy with piribedil, another dopamine agonist. Although not marketed in several countries, piribedil was chosen in this study because of its broad use in France over several decades with well known safety profile and relatively low cost compared with more recent dopamine agonists, the fact that it is a non-ergot drug, its known efficacy on motor symptoms in Parkinson's disease but also based on early studies indicating a benefit on depression (Post *et al.*, 1978; Castro-Caldas *et al.*, 2006; Rascol *et al.*, 2006, 2010). Most importantly, in a previous study (Thobois *et al.*, 2010) we had shown that dopamine withdrawal syndrome is related to mesolimbic dopaminergic denervation and we hypothesized that a D2/D3 agonist should be beneficial on non-motor psychic symptoms that we have classified as hypodopaminergic (Ardouin *et al.*, 2009). As the D3 subtype is the main dopamine receptor of the mesolimbic dopaminergic system (Sokoloff *et al.*, 2006) the efficacy should be relatively

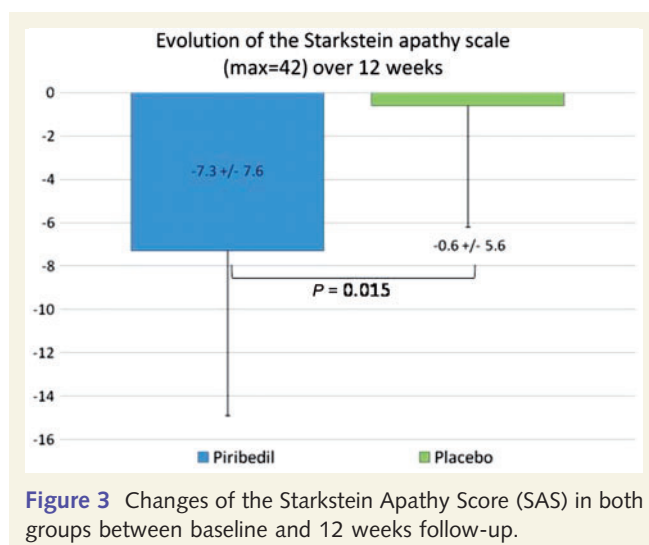

**Table 2** Evolution of the neuropsychological parameters between baseline and 12 weeks follow-up

| Scales                                      |                                          | Piribedil group (n = 19) | Placebo Group (n = 18) | P-value |
|---------------------------------------------|------------------------------------------|--------------------------|------------------------|---------|
| Primary endpoint                            |                                          |                          |                        |         |
| Starkstein apathy scale                     | Baseline                                 | 21.1 ± 4.8               | 18.9 ± 4.2             | 0.015   |
|                                             | 12 weeks                                 | 13.8 ± 7.5               | 18.3 ± 5.4             |         |
|                                             | Difference between baseline and 12 weeks | −7.3 ± 7.6 (−34.6%)      | −0.6 ± 5.6 (−3.2%)     |         |
| Secondary endpoints                         |                                          |                          |                        |         |
| Beck depression inventory                   | Baseline                                 | 16.7 ± 5.9               | 14.3 ± 6.6             | 0.29    |
|                                             | 12 weeks                                 | 13.4 ± 9.6               | 14.6 ± 8.6             |         |
|                                             | Difference between baseline and 12 weeks | −3.3 ± 8.8 (−19.8%)      | 0.2 ± 7.3 (+1.4%)      |         |
| Beck anxiety inventory                      | Baseline                                 | 14.9 ± 10.5              | 8.4 ± 6.2              | 0.41    |
|                                             | 12 weeks                                 | 11.5 ± 10.1              | 7.5 ± 6.1              |         |
|                                             | Difference between baseline and 12 weeks | −3.4 ± 8.1 (−22.8%)      | −0.8 ± 4.6 (−8.3%)     |         |
| Anhedonia: SHAPS                            | Baseline                                 | 3 ± 2.3                  | 2.2 ± 3.1              | 0.08    |
|                                             | 12 weeks                                 | 1.5 ± 1.9                | 1.9 ± 3.6              |         |
|                                             | Difference between baseline and 12 weeks | −1.5 ± 2.4 (−49%)        | −0.4 ± 1.4 (−15.6%)    |         |
| Quality of life: PDQ39 (summary index)      | Baseline                                 | 7.2 ± 2.5                | 5.7 ± 2.3              | 0.08    |
|                                             | 12 weeks                                 | 6 ± 2.9                  | 6.1 ± 2.1              |         |
|                                             | Difference between baseline and 12 weeks | −1.2 ± 1.9 (−16.2%)      | 0.4 ± 2 (+6.7%)        |         |
| Exploratory endpoints                       |                                          |                          |                        |         |
| Hamilton depression scale                   | Baseline                                 | 12.6 ± 5.6               | 9.5 ± 5.5              | 0.05    |
|                                             | 12 weeks                                 | 8.3 ± 6.2                | 9.2 ± 5.9              |         |
|                                             | Difference between baseline and 12 weeks | −4.3 ± 4.4 (−34.1%)      | −0.2 ± 5.1 (−2.1%)     |         |
| UPDRS motor score                           | Baseline                                 | 19.3 ± 9.8               | 14.9 ± 5.1             | 0.5     |
|                                             | 12 weeks                                 | 16.3 ± 7                 | 16 ± 8.3               |         |
|                                             | Difference between baseline and 12 weeks | −3.1 ± 8.2 (−15.8%)      | 1.1 ± 8.1 (7.1%)       |         |
| UPDRS motor complication score              | Baseline                                 | 1.5 ± 2.1                | 1.1 ± 1.6              | 0.23    |
|                                             | 12 weeks                                 | 2.2 ± 2.1                | 1.4 ± 1.7              |         |
|                                             | Difference between baseline and 12 weeks | 0.7 ± 1.9                | 0.3 ± 0.8              |         |
| UPDRS activities of daily living            | Baseline                                 | 11.7 ± 6                 | 8.3 ± 4.4              | 0.03    |
|                                             | 12 weeks                                 | 10.5 ± 5.6               | 9.6 ± 4.7              |         |
|                                             | Difference between baseline and 12 weeks | −1.2 ± 6.3 (−10.3%)      | 1.3 ± 3.3 (15.7%)      |         |
| UPDRS Mentation, behaviour and mood         | Baseline                                 | 3.7 ± 1.7                | 3.9 ± 1.4              | 0.14    |
|                                             | 12 weeks                                 | 2.6 ± 2.2                | 3.6 ± 1.9              |         |
|                                             | Difference between baseline and 12 weeks | −1.2 ± 6.3 (−30.7%)      | −0.2 ± 2 (−6.2%)       |         |
| Young mania scale                           | Baseline                                 | 0.11 ± 0.32              | 0.06 ± 0.24            | 0.56    |
|                                             | 12 weeks                                 | 0.32 ± 1                 | 0.06 ± 0.24            |         |
|                                             | Difference between baseline and 12 weeks | 0.21 ± 1                 | 0                      |         |
| Hyperdopaminergic behaviour (Ardouin scale) | Baseline                                 | 0.07 ± 0.08              | 0.11 ± 0.19            | 0.49    |
|                                             | 12 weeks                                 | 0.13 ± 0.09              | 0.11 ± 0.14            |         |
|                                             | Difference between baseline and 12 weeks | 0.06 ± 0.14              | 0 ± 0.19               |         |
| Apathy: Robert Inventory                    | Baseline                                 | 12.3 ± 5.3               | 12.3 ± 7.6             | 0.005   |
|                                             | 12 weeks                                 | 6.6 ± 6                  | 12.6 ± 8.1             |         |
|                                             | Difference between baseline and 12 weeks | −5.7 ± 5.7 (−46.6%)      | 0.3 ± 7.4 (+2.3%)      |         |

SHAPS = Snaith-Hamilton Pleasure Scale; UPDRS = Unified Parkinson's Disease Rating Scale.

**Table 3** Side effects

|                     | Piribedil group (n = 19) | Placebo group (n = 18) |
|---------------------|--------------------------|------------------------|
| Dyskinesia          | 2 (9.5%)                 | 0 (0%)                 |
| Gastric pain        | 0 (0%)                   | 1 (5.6%)               |
| Hallucinations      | 1 (5.3%)                 | 0 (0%)                 |
| Irritability        | 1 (5.3%)                 | 0 (0%)                 |
| Prostatic carcinoma | 0 (0%)                   | 1 (5.6%)               |

selective on non-motor symptoms without inducing too much dyskinesia, which can be a problem after surgery when using D1/D2 agonists such as apomorphine or when using levodopa. Interestingly pramipexole, which also stimulates D2/D3 receptor selectively has been shown to have an effect on parkinsonian depression (Barone *et al.*, 2010) arguing for a class effect, and we would suggest the use of any other of the available non-ergot D2/D3 agonist to treat hypodopaminergic symptoms in case piribedil, for which we now have class 2 evidence for its efficacy on parkinsonian apathy, is not available. Our findings provide further

arguments in favour of the 'hypodopaminergic hypothesis' explaining both apathy and depression in Parkinson's disease after drastic reduction of dopamine replacement therapy after subthalamic nucleus stimulation (Thobois *et al.*, 2010) or because of abrupt withdrawal of a dopamine agonist in the context of psychosis, impulse control disorder or dopamine dysregulation syndrome (Rabinak and Nirenberg, 2010; Pondal *et al.*, 2013). It adds the notion that anhedonia may also be part of the hypodopaminergic spectrum, consistent with the notion that anhedonia is one aspect of apathy (Levy and Dubois, 2006; Dujardin and Defebvre, 2012). Mesolimbic dopaminergic denervation could well mediate apathy, depression and anxiety, as shown by PET studies (Remy *et al.*, 2005; Thobois *et al.*, 2010) albeit dopaminergic denervation is not the exclusive aetiology of apathy (Levy and Dubois, 2006; Gallagher and Schrag, 2012). This fits well with the role of the dopaminergic system in motivated behaviour (Voon *et al.*, 2009). From a therapeutic point of view, it is interesting to note that the reduced novelty-seeking personality trait in *de novo* drug-naïve patients with Parkinson's disease can be reversed by dopaminergic agonists (Bódi *et al.*, 2009) and that depression in Parkinson's disease can also be improved by dopamine agonists such as pramipexole (Barone *et al.*, 2010). In addition, we demonstrated in a previous  $^{11}\text{C}$ -raclopride PET study performed before and after methylphenidate that apathetic patients experienced an improvement in asthenia and affective subscores of the Norris visual analogue scale after intake of methylphenidate, a relatively selective mesolimbic dopamine reuptake inhibitor (Thobois *et al.*, 2010). Similarly, in another study analysing the benefits of methylphenidate on freezing of gait in Parkinson's disease, the authors noted an improvement of the scores of the Lille Apathy rating scale in a subpopulation of apathetic patients (Moreau *et al.*, 2012). The present controlled study extends these findings and demonstrates that piribedil can also reverse postoperative apathy in patients with advanced Parkinson's disease treated with subthalamic nucleus stimulation.

Improvement in depression only reached statistical threshold when the Hamilton clinician rated scale was used, but failed to do so when depression was assessed by the Beck Depression Inventory self questionnaire. Before discussing this result, it should be acknowledged that depression was not assessed by a structured interview and we can only speak about depressive symptoms without formal diagnosis of depression. The lack of robust effect of piribedil on depressive manifestations can be explained by the exclusion of the most severely depressed patients. Indeed the efficacy of antidepressant drugs is more difficult to demonstrate in moderately severe depression (Fournier *et al.*, 2010). In addition, depression in Parkinson's disease is only partly responsive to dopaminergic drugs and other neurotransmitters are also involved in its pathophysiology, which could explain the less robust efficacy of piribedil for depression (Even and Weintraub, 2012). Beyond this, a lack of power and the relatively small number of subjects with depression are likely to explain this inconclusive result. Given these limitations the tendency for depression improvement by piribedil should not be totally neglected but remains to be demonstrated in a study that is properly powered.

The same explanation can be applied to the absence of statistically significant effect of piribedil on anhedonia and anxiety. This result could be linked to the absence of depression improvement. Indeed, there is a clear association between depression and anhedonia, and dopaminergic agonists such as pramipexole preferentially improve anhedonia in depressed patients with Parkinson's disease (Lemke *et al.*, 2005).

In the present study we also observed a trend for improvement in quality of life, which, in the absence of motor improvement, is likely related to the improvement of apathy, which is one of the key factors of reduced quality of life in patients with Parkinson's disease (Schrag *et al.*, 2000; Chaudhuri and Schapira, 2009; Barone *et al.*, 2010; Benito-Leon *et al.*, 2012). However, in this relatively small series, this improvement did not reach significance level. Overall, there is a need to carry out studies in larger patient populations, selected for the presence of depression, anhedonia and anxiety, in order to study the effects of dopamine agonists on these symptoms and on quality of life.

In terms of side effects, it is of great interest to note that the improvement of apathy by piribedil was associated with a very limited increased incidence of hyperdopaminergic behavioural manifestations despite the use of high doses of a dopamine agonist (one patient developed an excessive irritability under piribedil). This supports the relative safety of treating postoperative apathy with the D2/D3 dopamine agonist piribedil and the limited risk of developing hyperdopaminergic behaviours after subthalamic nucleus deep brain stimulation in a patient population presenting with apathy and having a marked decrease in pulsatile L-treatment and in non-motor fluctuations (Lhommée *et al.*, 2012) even if one of the patients had to be excluded from the study because of hallucinations. However, this relative safety should be taken with caution as the follow-up period in the double-blind study was relatively short and the sample size was limited.

Overall, the present study shows that when apathy does occur after subthalamic nucleus deep brain stimulation, the best strategy is to increase or reintroduce a D2/D3 dopamine agonist. This treatment option should be performed in a rapid manner. Indeed, some patients in the piribedil arm of the present study had to be excluded from the pharmacological protocol shortly after entering it due to lack of quick improvement. The demonstration of an effective strategy of treatment and the impact of apathy on quality of life highlight the importance of carefully monitoring motivation in surgical patients, as apathy is the most prominent symptom of the hypodopaminergic syndrome (Thobois *et al.*, 2010).

In conclusion, this study demonstrates the efficacy of the D2/D3 dopamine agonist piribedil in the reversal of parkinsonian apathy occurring after subthalamic nucleus deep brain stimulation and points to the importance of the mesolimbic dopaminergic system in human motivated behaviour. It provides clear indications on how to handle apathy observed in patients with Parkinson's disease operated on with subthalamic nucleus deep brain stimulation. However, these results cannot, without further studies, be extended in general to apathy in Parkinson's disease. In particular, apathy in the elderly demented patient should not be managed in the same way as relatively sudden onset apathy in a context of withdrawal of dopamine replacement treatment in a young and



non-demented patient. This effect is probably a class effect of dopamine agonists that are relatively selective for the mesolimbic D3 receptor, but further controlled studies are needed to extend these findings to other dopamine agonists. In the future, it would be of great interest to study whether apathy can also be improved by treatment with a dopamine agonist in *de novo* patients with Parkinson's disease who constitute another model of parkinsonian apathy without the confounding effects of concurrent dopaminergic treatment or deep brain stimulation.

## Acknowledgements

We thank C. Dalmolin for English corrections.

## Funding

This work was supported by a grant from the Programme Hospitalier de Recherche Clinique Interrégional 2004 and Euthérapie Company.

## Conflict of interest

S.C., P.Po., P.K., P.M. were granted funds from Medtronic for research purpose in the field of deep brain stimulation. Several authors received reimbursement of travel expenses to scientific meetings by Medtronic (S.C., P.Po., P.K., S.T., E.B. P.M.) and Euthérapie Company (to P.Po., P.K., S.T. and E.B.).

## References

- Aarsland D, Marsh L, Schrag A. Neuropsychiatric symptoms in Parkinson's disease. *Mov Disord* 2009; 24: 2175–86.
- Ardouin C, Chéreau I, Llorca PM, Lhommée E, Durif F, Pollak P, et al. Assessment of hyper- and hypodopaminergic behaviors in Parkinson's disease. *Rev Neurol (Paris)* 2009; 165: 845–56.
- Barone P, Poewe W, Albrecht S, Debieuvre C, Massey D, Rascol O, et al. Pramipexole for the treatment of depressive symptoms in patients with Parkinson's disease: a randomised, double-blind, placebo-controlled trial. *Lancet Neurol* 2010; 9: 573–80.
- Beck A, Ward C, Mendelson M, Mock J, Erbaugh J. An inventory for measuring depression. *Arch Gen Psychiatry* 1961; 4: 561–71.
- Beck AT, Epstein N, Brown G, Steer RA. An inventory for measuring clinical anxiety: psychometric properties. *J Consult Clin Psychol* 1988; 56: 893–7.
- Benito-Leon J, Cubo E, Coronell C. Impact of apathy on health-related quality of life in recently diagnosed Parkinson's disease: the ANIMO study. *Mov Disord* 2012; 27: 211–8.
- Bódi N, Kéri S, Nagy H, Moustafa A, Myers CE, Daw N, et al. Reward-learning and the novelty-seeking personality: a between- and within-subjects study of the effects of dopamine agonists on young Parkinson's patients. *Brain* 2009; 132 (Pt 9): 2385–95.
- Castro-Caldas A, Delwaide P, Jost W, Merello M, Williams A, Lamberti P, et al. The Parkinson-Control study: a 1-year randomized, double-blind trial comparing piribedil (150 mg/day) with bromocriptine (25 mg/day) in early combination with levodopa in Parkinson's disease. *Mov Disord* 2006; 21: 500–9.
- Chaudhuri KR, Schapira AH. Non-motor symptoms of Parkinson's disease: dopaminergic pathophysiology and treatment. *Lancet Neurol* 2009; 8: 464–74.
- Czernecki V, Schüpbach M, Yaici S, Lévy R, Bardinet E, Yelnik J, et al. Apathy following subthalamic stimulation in Parkinson disease: a dopamine responsive symptom. *Mov Disord* 2008; 23: 964–9.
- Deuschl G, Schade-Brittinger C, Krack P, Volkmann J, Schäfer H, Bötzel K, et al. A randomized trial of deep-brain stimulation for Parkinson's disease. *N Engl J Med* 2006; 355: 896–908.
- Dujardin K, Defebvre L. Apathy in Parkinson's disease: what are the underlying mechanisms. *Neurology* 2012; 79: 1082–3.
- Even C, Weintraub D. Is depression in Parkinson's disease (PD) a specific entity? *J Affect Disord* 2012; 139: 103–12.
- Fournier JC, DeRubeis RJ, Hollon SD, Dimidjian S, Amsterdam JD, Shelton RC, et al. Antidepressant drug effects and depression severity: a patient-level meta-analysis. *JAMA* 2010; 303: 47–53.
- Funkiewiez A, Ardouin C, Caputo E, Krack P, Fraix V, Klinger H, et al. Long term effects of bilateral subthalamic nucleus stimulation on cognitive function, mood, and behaviour in Parkinson's disease. *J Neurol Neurosurg Psychiatry* 2004; 75: 834–9.
- Gallagher DA, Schrag A. Psychosis, apathy, depression and anxiety in Parkinson's disease. *Neurobiol Dis* 2012; 46: 581–9.
- Hamilton M. A rating scale for depression. *J Neurol Neurosurg Psychiatry* 1960; 23: 56–62.
- Krack P, Batir A, Van Blercom N, Chabardes S, Fraix V, Ardouin C, et al. Five-year follow-up of bilateral stimulation of the subthalamic nucleus in advanced Parkinson's disease. *N Engl J Med* 2003; 349: 1925–34.
- Leentjens AF, Koester J, Fruh B, Shephard DT, Barone P, Houben JJ. The effect of pramipexole on mood and motivational symptoms in Parkinson's disease: a meta-analysis of placebo-controlled studies. *Clin Ther* 2009; 31: 89–98.
- Lemke MR, Brecht HM, Koester J, Kraus PH, Reichmann H. Anhedonia, depression, and motor functioning in Parkinson's disease during treatment with pramipexole. *J Neuropsychiatry Clin Neurosci* 2005; 17: 214–20.
- Levy R, Dubois B. Apathy and the functional anatomy of the prefrontal cortex-basal ganglia circuits. *Cereb Cortex* 2006; 16: 916–28.
- Lhommée E, Klinger H, Thobois S, Schmitt E, Ardouin C, Bichon A, et al. Subthalamic stimulation in Parkinson's disease: restoring the balance of motivated behaviours. *Brain* 2012; 135 (Pt 5): 1463–77.
- Limousin P, Krack P, Pollak P, Benazzouz A, Ardouin C, Hoffmann D, et al. Electrical stimulation of the subthalamic nucleus in advanced Parkinson's disease. *N Engl J Med* 1998; 339: 1105–11.
- Millan M. From the cell to the clinic: a comparative review of the partial D<sub>2</sub>/D<sub>3</sub> receptor agonist and  $\alpha$ -2-adrenoceptor antagonist, piribedil, in the treatment of Parkinson's disease. *Pharmacol Ther* 2010; 128: 229–73.
- Moreau C, Delval A, Defebvre L, Dujardin K, Duhamel A, Petyt G, et al. Methyphenidate for gait hypokinesia and freezing in patients with Parkinson's disease undergoing subthalamic stimulation: a multicentre, parallel, randomised, placebo-controlled trial. *Lancet Neurol* 2012; 11: 589–596.
- Odekerken VJ, van Laar T, Staal MJ, Mosch A, Hoffmann CF, Nijssen PC, et al. Subthalamic nucleus versus globus pallidus bilateral deep brain stimulation for advanced Parkinson's disease (NSTAPS study): a randomised controlled trial. *Lancet Neurol* 2013; 12: 37–44.
- Pluck G, Brown RG. Apathy in Parkinson's disease. *J Neurol Neurosurg Psychiatry* 2002; 73: 636–42.
- Pondal M, Marras C, Miyasaki J, Moro E, Armstrong MJ, Strafella AP, et al. Clinical features of dopamine agonist withdrawal syndrome in a movement disorders clinic. *J Neurol Neurosurg Psychiatry* 2013; 84: 130–5.
- Post RM, Gerner RH, Carman JS, Gillin JC, Jimerson DC, Goodwin FK, et al. Effects of a dopamine agonist piribedil in depressed patients: relationship of pretreatment homovanillic acid to antidepressant response. *Arch Gen Psychiatry* 1978; 35: 609–15.
- Rabinak CA, Nirenberg MJ. Dopamine agonist withdrawal syndrome in Parkinson disease. *Arch Neurol* 2010; 67: 58–63.

- Rascol O, Dubois B, Caldas AC, Senn S, Del Signore S, Lees A, Parkinson REGAIN Study Group. Early piribedil monotherapy of Parkinson's disease: A planned seven-month report of the REGAIN study. *Mov Disord* 2006; 21: 2110–5.
- Rascol O, Azulay JP, Blin O, Bonnet AM, Brefel-Courbon C, Césaro P, et al. Orodispersible sublingual piribedil to abort OFF episodes: a single dose placebo-controlled, randomized, double-blind, cross-over study. *Mov Disord* 2010; 25: 368–76.
- Rektorova I, Balaz M, Svatova J, Zarubova K, Honig I, Dostal V, et al. Effects of ropinirole on nonmotor symptoms of Parkinson disease: a prospective multicenter study. *Clin Neuropharmacol* 2008; 31: 261–6.
- Remy P, Doder M, Lees A, Turjanski N, Brooks D. Depression in Parkinson's disease: loss of dopamine and noradrenaline innervation in the limbic system. *Brain* 2005; 128 (Pt 6): 1314–22.
- Robert PH, Claret S, Benoit M, Koutaich J, Bertogliati C, Tible O, et al. The apathy inventory: assessment of apathy and awareness in Alzheimer's disease, Parkinson's disease and mild cognitive impairment. *Int J Geriatr Psychiatry* 2002; 17: 1099–105.
- Sackett D, Haynes R, Guyatt G, Tugwell P. *Clinical epidemiology. A basic science for clinical medicine*. 2nd edn. Boston: Little, Brown and Co; 1991. p. 441.
- Schrag A, Jahanshahi M, Quinn N. What contributes to quality of life in patients with Parkinson's disease? *J Neurol Neurosurg Psychiatry* 2000; 69: 308–12.
- Snaith RP, Hamilton M, Morley S, Humayan A, Hargreaves D, Trigwell P. A scale for the assessment of hedonic tone: the Snaith-Hamilton pleasure scale. *Br J Psychiatry* 1995; 167: 99–103.
- Sokoloff P, Diaz J, Le Foll B, Guillin O, Leriche L, Bezard E, et al. The dopamine D3 receptor: a therapeutic target for the treatment of neuropsychiatric disorders. *CNS Neurol Disord Drug Targets* 2006; 5: 25–43.
- Starkstein SE, Mayberg HS, Preziosi TJ, Andrezejewski P, Leiguarda R, Robinson RG. Reliability, validity, and clinical correlates of apathy in Parkinson's disease. *J Neuropsychiatry Clin Neurosci* 1992; 4: 134–9.
- Starkstein SE. Apathy in Parkinson's disease: diagnostic and etiological dilemmas. *Mov Disord* 2012; 27: 174–8.
- Thobois S, Ardouin C, Lhommée E, Klinger H, Lagrange C, Xie J, et al. Non-motor dopamine withdrawal syndrome after surgery for Parkinson's disease: predictors and underlying mesolimbic denervation. *Brain* 2010; 133 (Pt 4): 1111–27.
- Voon V, Fernagut PO, Wickens J, Baunez C, Rodriguez M, Pavon N, et al. Chronic dopaminergic stimulation in Parkinson's disease: from dyskinesias to impulse control disorders. *Lancet Neurol* 2009; 8: 1140–9.
- Voon V, Krack P, Lang AE, Lozano AM, Dujardin K, Schüpbach M, et al. A multicentre study on suicide outcomes following subthalamic stimulation for Parkinson's disease. *Brain* 2008; 131 (Pt 10): 2720–8.
- Witt K, Daniels C, Reiff J, Krack P, Volkmann J, Pinski MO, et al. Neuropsychological and psychiatric changes after deep brain stimulation for Parkinson's disease: a randomised, multicentre study. *Lancet Neurol* 2008; 7: 605–14.
- Young RC, Biggs JT, Ziegler VE, Meyer DA. A rating scale for mania: reliability, validity and sensitivity. *Br J Psychiatry* 1978; 133: 429–35.
